# Supplementary material for: Genetic evidence suggests posttraumatic stress disorder as a subtype of major depressive disorder
Source: JCI journal article supplement (doi:10.1172/jci145942), 2021-04-27
Supplement: sd3 [file 3]

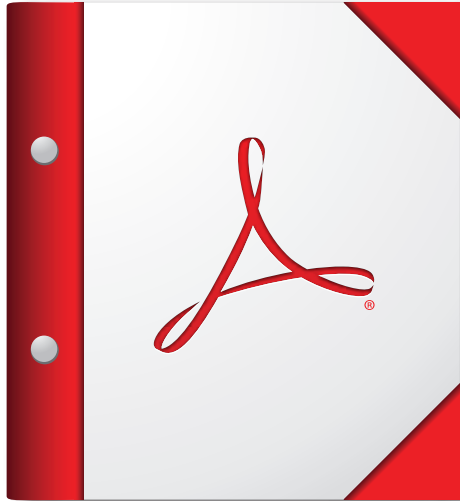

**For the best experience, open this PDF portfolio in  
Acrobat X or Adobe Reader X, or later.**

[Get Adobe Reader Now!](#)
